# Supplementary material for: Host Jumps and Radiation, Not Co‐Divergence Drives Diversification of Obligate Pathogens. A Case Study in Downy Mildews and Asteraceae
Source: PubMed Central journal article supplement (PMC4521919; doi:10.1371/journal.pone.0133655), 2015-07-31

# Pathogen - *Bremia*

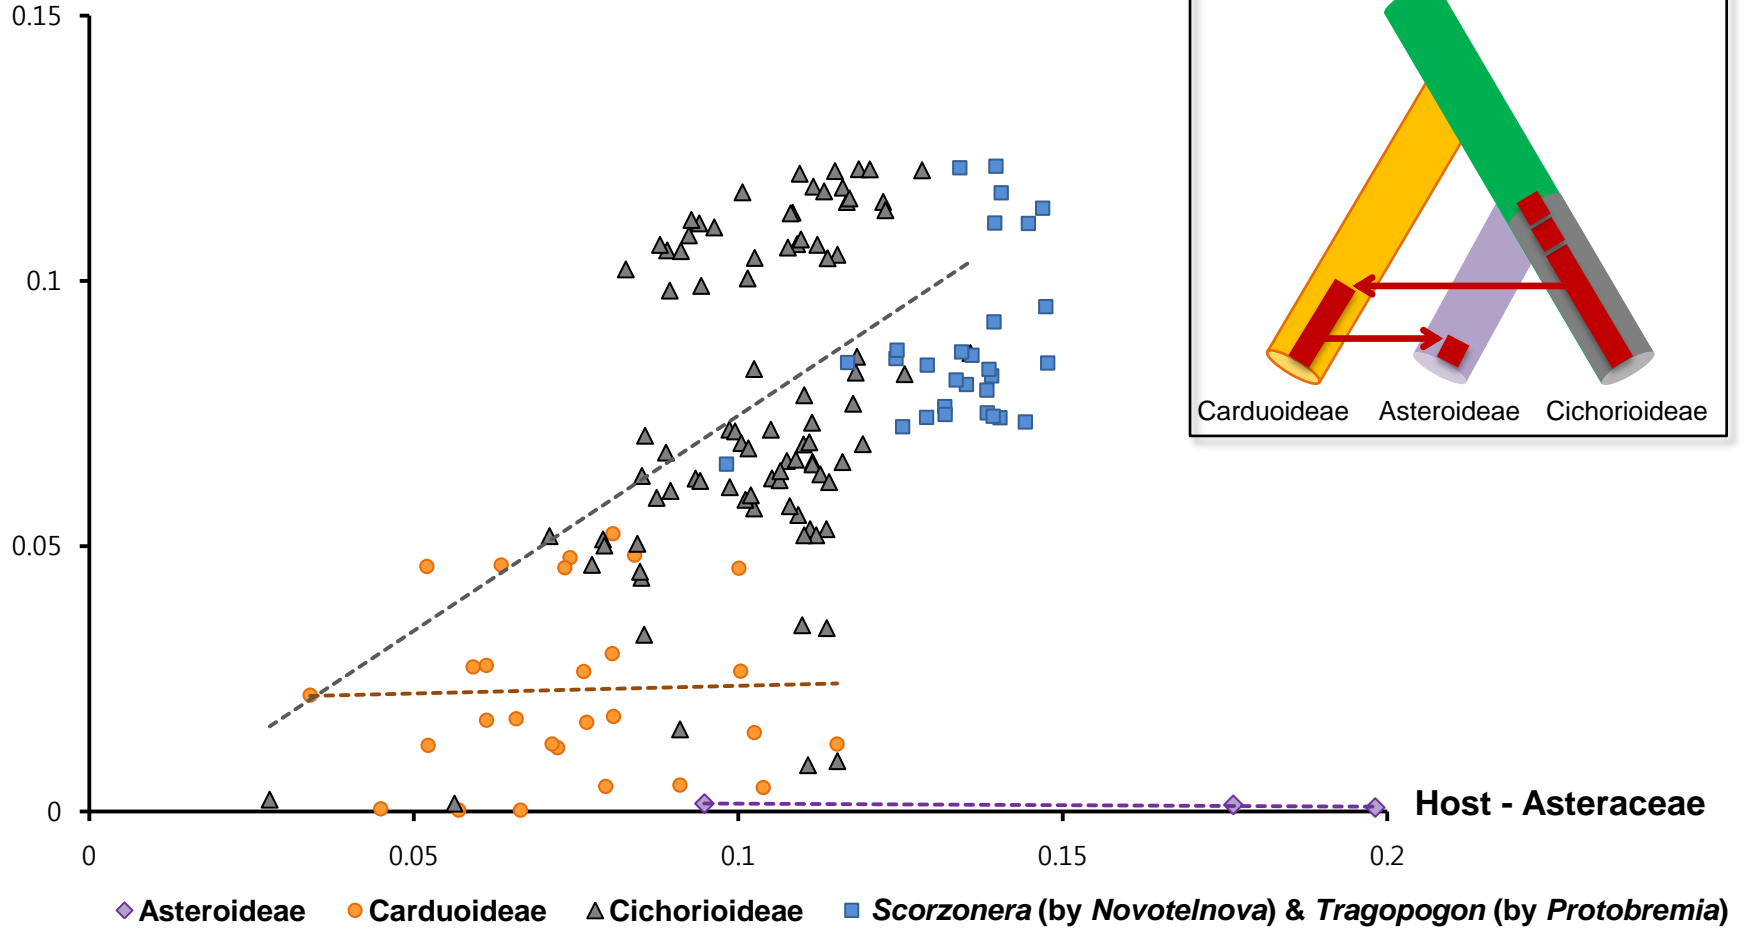

Supplement: pone.0133655.s001.pdf [file pone.0133655.s001.pdf]
